# Supplementary material for: Decisions with Uncertain Consequences—A Total Ordering on Loss-Distributions
Source: PubMed Central journal article supplement (PMC5193423; doi:10.1371/journal.pone.0168583), 2016-12-28
Supplement: pone.0168583.s001.pdf [file pone.0168583.s001.pdf]

## S1 Proofs

### S1.1 Proof of Lemma 2

We first discuss the continuous case, which illustrates the basic idea that can be applied alike to categorical and discrete distributions.

Let  $f_1, f_2$  denote the densities of the distributions  $F_1, F_2$ . Fix the smallest  $b^* > 1$  so that  $\Omega := [1, b^*]$  covers both the supports of  $F_1$  and  $F_2$ . Consider the difference of the  $k$ -th moments, given by

$$\begin{aligned} \Delta(k) &:= E(R_1^k) - E(R_2^k) = \int_{\Omega} x^k f_1(x) dx - \int_{\Omega} x^k f_2(x) dx \\ &= \int_{\Omega} x^k (f_1 - f_2)(x) dx. \end{aligned} \tag{1}$$

Towards a lower bound to (1), we distinguish two cases:

1. If  $f_1(x) > f_2(x)$  for all  $x \in \Omega$ , then  $(f_1 - f_2)(x) > 0$  and because  $f_1, f_2$  are continuous, their difference attains a minimum  $\lambda_2 > 0$  on the compact set  $\Omega$ . So, we can lower-bound (1) as  $\Delta(k) \geq \lambda_2 \int_{\Omega} x^k dx \rightarrow +\infty$ , as  $k \rightarrow \infty$ .
2. Otherwise, we look at the right end of the interval  $\Omega$ , and define

$$a^* := \inf \{x \geq 1 : f_1(x) > f_2(x)\}.$$

Without loss of generality, we may assume  $a^* < b^*$ . To see this, note that if  $f_1(b^*) \neq f_2(b^*)$ , then the continuity of  $f_1 - f_2$  implies  $f_1(x) \neq f_2(x)$  within a range  $(b^* - \varepsilon, b^*]$  for some  $\varepsilon > 0$ , and  $a^*$  is the supremum of all these  $\varepsilon$ . Otherwise, if  $f_1(x) = f_2(x)$  on an entire interval  $[b^* - \varepsilon, b^*]$  for some  $\varepsilon > 0$ , then  $f_1 \not> f_2$  on  $\Omega$  (the opposite of the previous case) implies the existence of some  $\xi < b^*$  so that  $f_1(x) < f_2(x)$ , and  $a^*$  is the supremum of all these  $\xi$  (see Fig A for an illustration). In case that  $\xi = 0$ , we would have  $f_1 \geq f_2$  on  $\Omega$ , which is either trivial (as  $\Delta(k) = 0$  for all  $k$  if  $f_1 = f_2$ ) or otherwise covered by the previous case. In either situation, we can fix a compact interval  $[a, b] \subset (a^*, b^*) \subset [1, b^*] = \Omega$  and two constants  $\lambda_1, \lambda_2 > 0$  (which exist because  $f_1, f_2$  are bounded as being continuous on the compact set  $\Omega$ ), so that the function

$$\ell(k, x) := \begin{cases} -\lambda_1 x^k, & \text{if } 1 \leq x < a; \\ \lambda_2 x^k, & \text{if } a \leq x \leq b. \end{cases}$$

lower-bounds the difference of densities in (1) (see Fig A), and

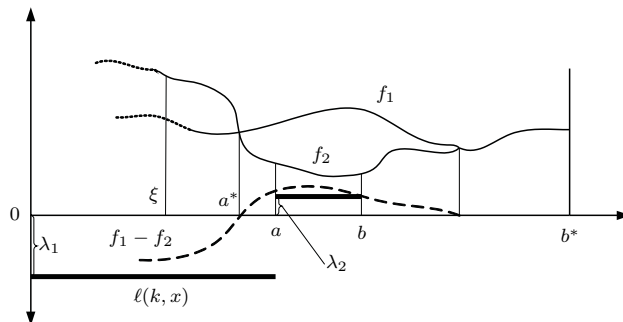

Figure A. Lower-bounding the difference of densities

$$\begin{aligned} \Delta(k) &= \int_1^{b^*} x^k (f_1 - f_2)(x) dx \geq \int_1^b \ell(x, k) dx \\ &= -\lambda_1 \int_1^a x^k dx + \lambda_2 \int_a^b x^k dx \\ &= -\frac{a^{k+1}}{k+1} (\lambda_1 + \lambda_2) + \lambda_2 \frac{b^{k+1}}{k+1} \rightarrow +\infty, \end{aligned}$$

as  $k \rightarrow \infty$  due to  $a < b$  and because  $\lambda_1, \lambda_2$  are constants that depend only on  $f_1, f_2$ .

In both cases, we conclude that, unless  $f_1 = f_2$ ,  $\Delta(k) > 0$  for sufficiently large  $k \geq K$  where  $K$  is finite. This establishes the lemma for continuous distributions.

In the discrete or categorical case, the argument remains the same, only adapted to looking at the finite set of values on which  $f_1 \geq f_2$ . The largest value less than  $a$  above which equality holds until the end of the support then determines the growth of the difference sequence in the same way as was argued in Section 4.1. □

### S1.2 Proof of Theorem 2

Let  $f_1, f_2$  be the density functions of  $F_1, F_2$ . Call  $\Omega = \text{supp}(F_1) \cup \text{supp}(F_2) = [0, a]$  the common support of both densities, and take  $\xi = \inf \{x \in \Omega : f_1(x) = f_2(x) = 0\}$ . Suppose there were an  $\varepsilon > 0$  so that  $f_1 > f_2$  on every interval  $[\xi - \delta, \xi]$  whenever  $\delta < \varepsilon$ , i.e.,  $f_1$  would be larger than  $f_2$  until both densities vanish (notice that  $f_1 = f_2 = 0$  on the right of  $\xi$ ). Then the proof of lemma 2 delivers the argument by which we would find a  $K \in \mathbb{N}$  so that  $E(X_1^k) > E(X_2^k)$  for every  $k \geq K$ , which would contradict  $F_1 \preceq F_2$ . Therefore, there must be a neighborhood  $[\xi - \delta, \xi]$  on which  $f_1(x) \leq f_2(x)$  for all  $x \in [\xi - \delta, \xi]$ . The claim follows immediately by setting  $x_0 = \xi - \delta$ , since taking  $x \geq x_0$ , we end up with  $\int_x^\xi f_1(t) dt \leq \int_x^\xi f_2(t) dt$ , and for  $i = 1, 2$  we have  $\int_x^\xi f_i(t) dt = \int_x^a f_i(t) dt = \Pr\{X_i > x\}$ . □

### S1.3 Proof of Lemma 3

Throughout the proof, let  $i \in \{1, 2\}$ . The truncated distribution density that approximates  $f_i$  is  $f_i(x)/(F_i(a_n) - F_i(0))$ , where  $[0, a_n]$  is the common support of  $n$ -th approximation to  $f_1, f_2$ . By construction,  $a_{n,i} \rightarrow \infty$  as  $n \rightarrow \infty$ , and therefore  $F_i(a_n) - F_i(0) \rightarrow 1$  for  $i = 1, 2$ . Consequently,

$$Q_n = \frac{F_1(a_n) - F_1(0)}{F_2(a_n) - F_2(0)} \rightarrow 1, \quad \text{as } n \rightarrow \infty,$$

and there is an index  $N$  such that  $Q_n > c$  for all  $n \geq N$ . In turn,

$$f_2(x) \cdot Q_n > f_2(x) \cdot c > f_1(x),$$

and by rearranging terms,

$$\frac{f_1(x)}{F_1(a_n) - F_1(0)} < \frac{f_2(x)}{F_2(a_n) - F_2(0)}, \tag{2}$$

for all  $x \geq x_0$  and all  $n \geq N$ . The last inequality (2) lets us compare the two approximations easily by the same arguments as have been used in the proof of lemma 2, and the claim follows.
